# Supplementary material
Source: PubMed Central journal article supplement (PMC3113666)

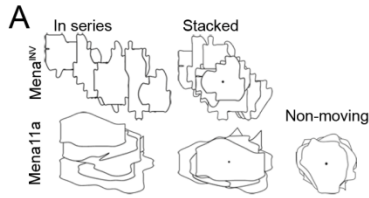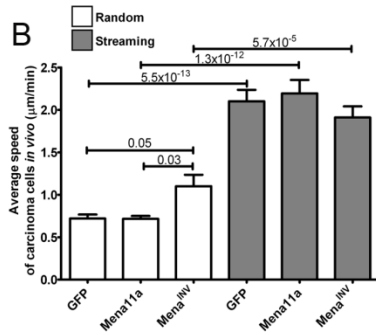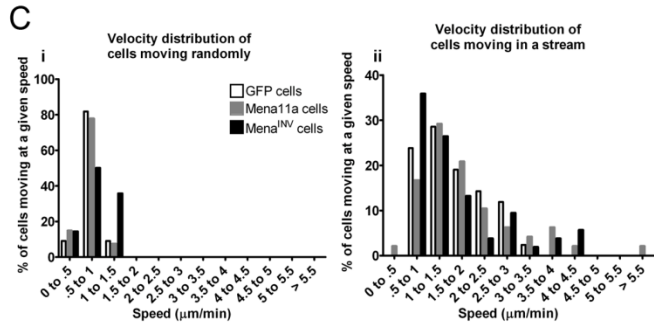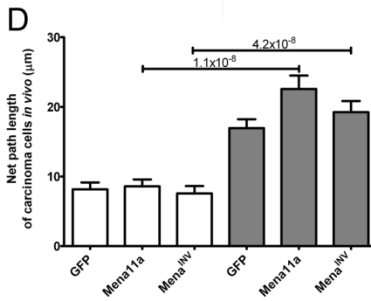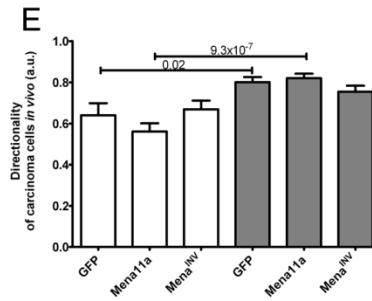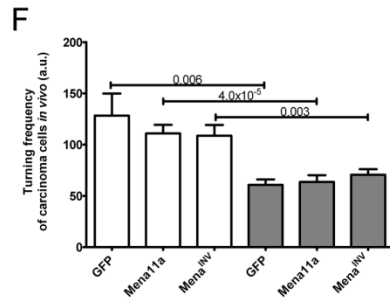

Supplement: supp_124.13.2120_JCS086231FigS1.pdf [file supp_124.13.2120_JCS086231FigS1.pdf]

**A**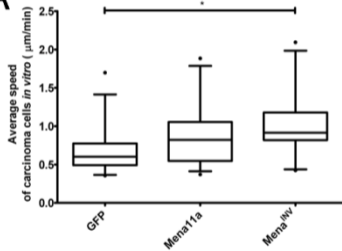**B**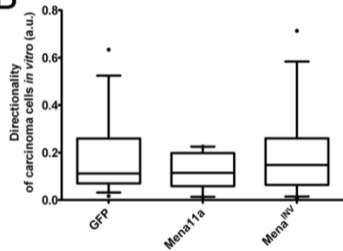

Supplement: supp_124.13.2120_JCS086231FigS2.pdf [file supp_124.13.2120_JCS086231FigS2.pdf]

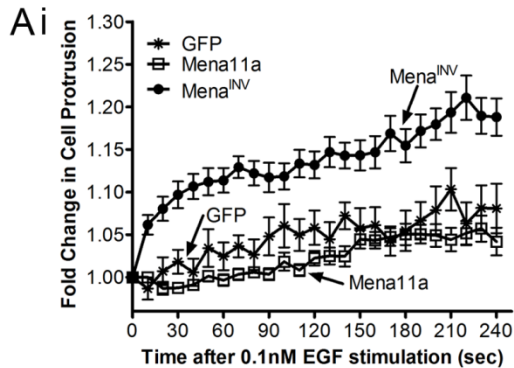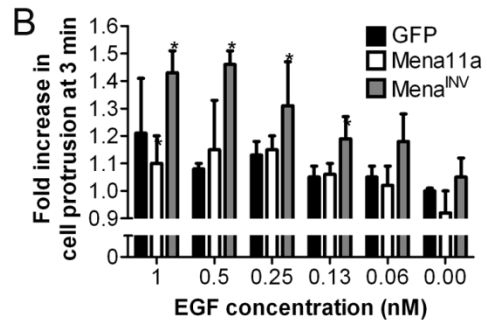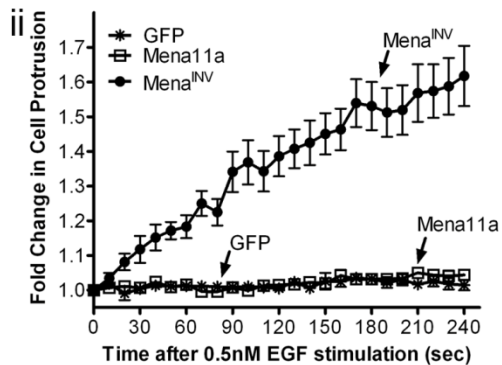

Supplement: supp_124.13.2120_JCS086231FigS3.pdf [file supp_124.13.2120_JCS086231FigS3.pdf]

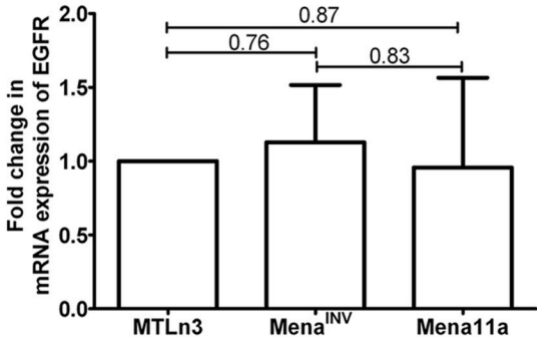

Supplement: supp_124.13.2120_JCS086231FigS4.pdf [file supp_124.13.2120_JCS086231FigS4.pdf]

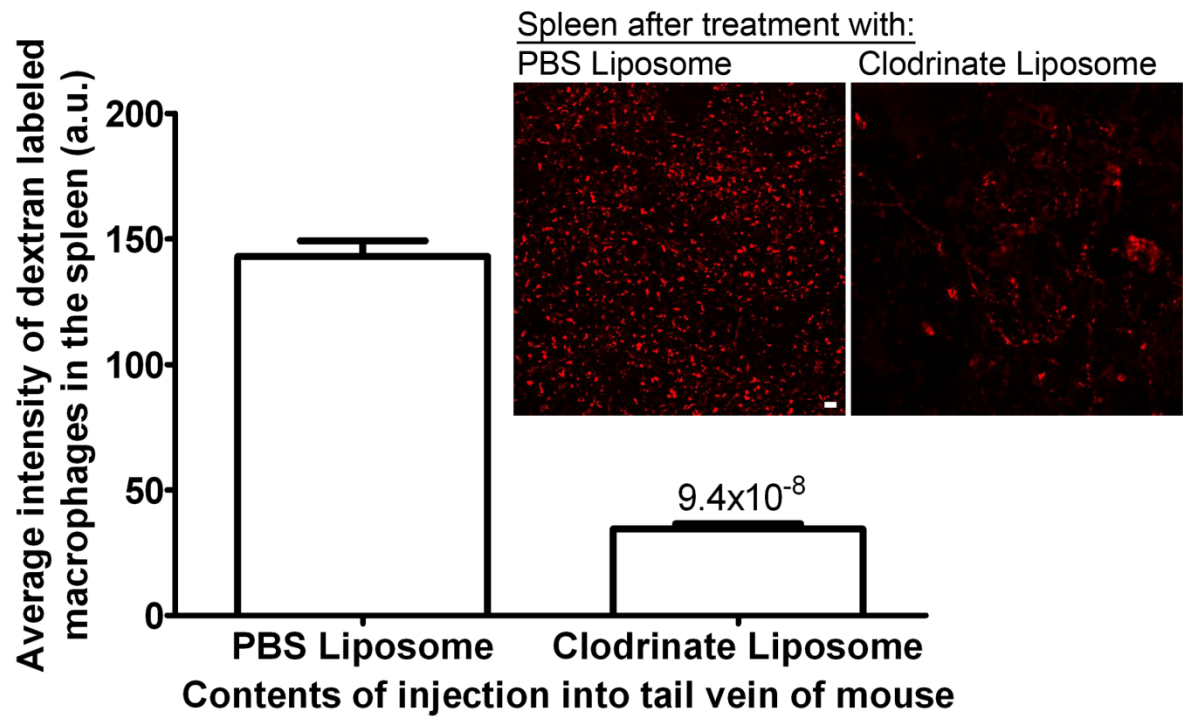

Supplement: supp_124.13.2120_JCS086231FigS5.pdf [file supp_124.13.2120_JCS086231FigS5.pdf]

**Tumor Volume at 3 weeks**

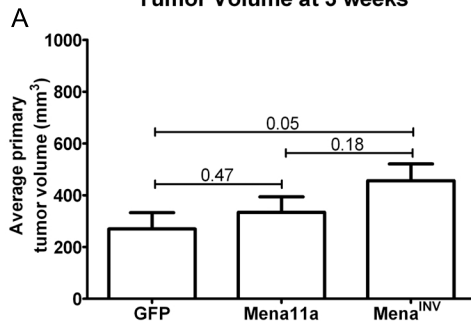

**Tumor Volume at 4 weeks**

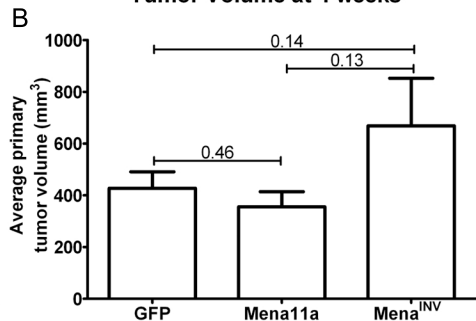

**C**

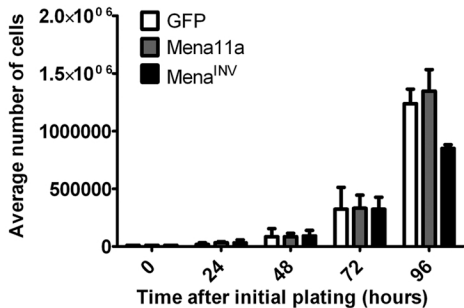

Supplement: supp_124.13.2120_JCS086231FigS6.pdf [file supp_124.13.2120_JCS086231FigS6.pdf]
